# Supplementary material for: MicroRNA and Target Protein Patterns Reveal Physiopathological Features of Glioma Subtypes
Source: PLoS One. 2011 May 31;6(5):e20600. doi: 10.1371/journal.pone.0020600 (PMC3105101; doi:10.1371/journal.pone.0020600)
Supplement: Table S5 — microRNA expression in gliomas. Data from the literature. Numbers refer to references indicated below. 1. Ciafre SA, Galardi S, Mangiola A, Ferracin M, Liu CG , et al. (2005) Extensive modulation of a set of microRNAs in primary glioblastoma. Biochem Biophys Res Commun 334 (4): 1351–1358. 2. Conti A, Aguennouz M, La Torre D, Tomasello C, Cardali S , et al. (2009) miR-21 and 221 upregulation and miR-181b downregulation in human grade II-IV astrocytic tumors. J Neurooncol 93(3): 325–332. 3. Gaur A, Jewell DA, Liang Y, Ridzon D, Moore JH , et al. (2007) Characterization of microRNA expression levels and their biological correlates in human cancer cell lines. Cancer Res 67(6): 2456–2468. 4. Godlewski J, Nowicki MO, Bronisz A, Williams S, Otsuki A , et al. (2008) Targeting of the Bmi-1 oncogene/stem cell renewal factor by microRNA-128 inhibits glioma proliferation and self-renewal. Cancer Res 68(22): 9125–9130. 5. Landgraf P, Rusu M, Sheridan R, Sewer A, Iovino N , et al. (2007) A mammalian microRNA expression atlas based on small RNA library sequencing. Cell 129(7): 1401–1414. 6. Lavon I, Zrihan D, Granit A, Einstein O, Fainstein N , et al. (2010) Gliomas display a microRNA expression profile reminiscent of neural precursor cells. Neuro Oncol 12(5): 422–433. 7. Malzkorn B, Wolter M, Liesenberg F, Grzendowski M, Stuhler K , et al. (2009) Identification and Functional Characterization of microRNAs Involved in the Malignant Progression of Gliomas. Brain Pathol 20(3): 539–550. 8. Nelson PT, Baldwin DA, Kloosterman WP, Kauppinen S, Plasterk RH , et al. (2006) RAKE and LNA-ISH reveal microRNA expression and localization in archival human brain. RNA 12(2): 187–191. 9. Ridzon D, Tan R, Nguyen J, Broomer A, Caifu C. (2005) MicroRNA Expression Signature in Human Glioblastoma Multiforme Brain Tumor. http://www3.appliedbiosystems.com/cms/groups/mcb_marketing/documents/generaldocuments/cms_042004.pdf. 10. Silber J, Lim DA, Petritsch C, Persson AI, Maunakea AK , et al. (2008) miR-124 [file pone.0020600.s009.xls]

## Sheet: Table S4
MicroRNA expression in gliomas. Data from the literature
Upregulated in			Downregulated in
	our data	let 7a
	our data	let 7b
	our data	let 7f
	our data	miR-374a
		miR-339-5p	our data
		miR-409-5p	our data
	our data	let 7d		3
1,7,8	our data	miR 9		5
7	our data	miR 16		9
	our data	miR 26b		3
9		miR 124	our data	4,6,8,10
	our data	miR 126		6
9	our data	miR 15b
6,7,9	our data	miR 17
6,7	our data	miR 20a
1-7,9,10	our data	miR 21
6,10	our data	miR 155
6,7,10	our data	miR 210
		miR 7	our data	3,5,10,11
		miR 127-3p	our data	6
		miR 128	our data	1,3-6,9,10
		miR 132	our data	6,9,10
		miR 134	our data	5
		miR 139-5p	our data	4,6,9,10
		miR 149	our data	3,9,10
		miR 330-3p	our data	3,9,10
